# Supplementary material
Source: PubMed Central journal article supplement (PMC10616768)
Supplement: jamaneurol-e233861-s003.pdf [file jamaneurol-e233861-s003.pdf]

## Supplementary Online Content

Edwards AL, Collins JA, Junge C, et al. Exploratory tau biomarker results from a multiple ascending-dose study of BIIB080 in Alzheimer disease: a randomized clinical trial. *JAMA Neurol*. Published online October 30, 2023. doi:10.1001/jamaneurol.2023.3861

**eMethods.** Partial volume corrected tau PET analysis

**eTable 1.** MAD baseline characteristics: All study participants

**eTable 2.** MAD baseline characteristics: Tau PET substudy participants with baseline and end-of-MAD scans

**eTable 3.** MAD baseline characteristics: Tau PET substudy participants with baseline and end-of-LTE scans

**eTable 4.** MAD baseline characteristics: LTE participants

**eTable 5.** Number of participants in each treatment group analyzed at each timepoint for CSF t-tau and p-tau181

**eTable 6.** Summary statistics for % change from baseline of CSF t-tau

**eTable 7.** Summary statistics for % change from baseline of CSF p-tau181

**eTable 8.** Summary statistics for change from baseline of tau PET SUVR at Week 25 by composite region

**eTable 9.** Summary statistics for change from baseline of tau PET SUVR at Week 100 by composite region

**eTable 10.** Summary statistics for change from baseline of partial volume-corrected tau PET SUVR at Week 25 by composite region

**eTable 11.** Summary statistics for change from baseline of partial volume-corrected tau PET SUVR at Week 100 by composite region

**eTable 12.** Ventricle, Hippocampus and Whole Brain Volumes

**eFigure 1.** Dosing, CSF sampling, and tau PET scan schedule for the MAD and LTE

**eFigure 2.** Change from baseline on CSF t-tau and p-tau181 in the MAD and LTE

**eFigure 3.** Longitudinal tau PET for individual participants

**eFigure 4.** Change from baseline on partial volume corrected tau PET in the MAD and LTE

**eFigure 5.** Baseline tau PET vs change from baseline tau PET

**eFigure 6.** Relationship between model-predicted CSF PK and tau PET change from baseline

### **eReferences**

This supplemental material has been provided by the authors to give readers additional information about their work.

**eMethods.** Partial volume corrected tau PET analysis.

Post-hoc partial volume corrected SUVRs were calculated for lobar composite ROIs, using the following steps. Each participants tau PET scan was spatially smoothed to 8mm FWHM, motion-corrected, averaged, and co-registered to their 3D-T1-weighted MRI. Partial volume correction was then performed with FreeSurfer using the region-based voxel-wise method<sup>1,2</sup>, and resampled to the participants MRI volume. Each participant's MRI was co-registered to an AD-specific MNI template<sup>3</sup>, and the Hammers atlas<sup>4</sup> ROIs were resampled to the subjects' MRI-space and eroded by 1mm to account for potential misalignment. Partial volume corrected SUVRs were then calculated for each lobar composite ROI<sup>5</sup> using the ventral cerebellum as a reference region.

**eTable 1.** MAD baseline characteristics: All study participants

Values are presented as mean  $\pm$  standard deviation. Percentages may not total 100 due to rounding.

|                               | Placebo           | BIIB080                          |                                  |                                  |                                     |                         |
|-------------------------------|-------------------|----------------------------------|----------------------------------|----------------------------------|-------------------------------------|-------------------------|
|                               | (N=12)            | Cohort A, 10mg every 4 wks (N=6) | Cohort B, 30mg every 4 wks (N=6) | Cohort C, 60mg every 4 wks (N=9) | Cohort D, 115mg every 12 wks (N=13) | BIIB080 combined (N=34) |
| Age (years)                   | 66 $\pm$ 4.6      | 64 $\pm$ 5.2                     | 65 $\pm$ 6.1                     | 66 $\pm$ 6.8                     | 67 $\pm$ 6.3                        | 66 $\pm$ 6.1            |
| Sex                           |                   |                                  |                                  |                                  |                                     |                         |
| Female (%)                    | 6 (50)            | 2 (33)                           | 4 (67)                           | 5 (56)                           | 6 (46)                              | 17 (50)                 |
| Male (%)                      | 6 (50)            | 4 (67)                           | 2 (33)                           | 4 (44)                           | 7 (54)                              | 17 (50)                 |
| Race – white (%)              | 12 (100)          | 6 (100)                          | 6 (100)                          | 9 (100)                          | 13 (100)                            | 34 (100)                |
| MMSE Total Score              | 24.2 $\pm$ 1.7    | 21.5 $\pm$ 1.6                   | 24.5 $\pm$ 1.4                   | 24.6 $\pm$ 2.5                   | 23.2 $\pm$ 2.5                      | 23.5 $\pm$ 2.4          |
| RBANS Total Score             | 64.9 $\pm$ 10.2   | 58.8 $\pm$ 11.2                  | 69.2 $\pm$ 12.1                  | 69.9 $\pm$ 9.1                   | 70.9 $\pm$ 13.4                     | 68.2 $\pm$ 12.1         |
| CDR Global Score (%)          |                   |                                  |                                  |                                  |                                     |                         |
| 0.5                           | 7 (58)            | 0 (0)                            | 3 (50)                           | 9 (100)                          | 11 (85)                             | 23 (68)                 |
| 1                             | 5 (42)            | 6 (100)                          | 3 (50)                           | 0 (0)                            | 2 (15)                              | 11 (32)                 |
| CDR Sum of Boxes              | 4.1 $\pm$ 1.3     | 4.8 $\pm$ 0.5                    | 4.7 $\pm$ 1.0                    | 2.9 $\pm$ 0.6                    | 3.3 $\pm$ 1.1                       | 3.7 $\pm$ 1.1           |
| Concomitant medications (%)   |                   |                                  |                                  |                                  |                                     |                         |
| Anticholinesterases           | 7 (58)            | 4 (67)                           | 5 (83)                           | 4 (44)                           | 8 (62)                              | 21 (62)                 |
| Memantine                     | 1 (8)             | 2 (33)                           | 0 (0)                            | 3 (33)                           | 2 (15)                              | 7 (21)                  |
| Estrogen replacement          | 0 (0)             | 1 (17)                           | 0 (0)                            | 1 (11)                           | 1 (8)                               | 3 (9)                   |
| ApoE $\epsilon$ 4 carrier (%) | 8 (67)            | 5 (83)                           | 3 (50)                           | 6 (67)                           | 11 (85)                             | 25 (74)                 |
| Heterozygous                  | 6 (50)            | 3 (50)                           | 3 (50)                           | 3 (33)                           | 8 (62)                              | 17 (50)                 |
| Homozygous                    | 2 (17)            | 2 (33)                           | 0 (0)                            | 3 (33)                           | 3 (23)                              | 8 (24)                  |
| Non-carrier                   | 4 (33)            | 1 (17)                           | 3 (50)                           | 3 (33)                           | 2 (15)                              | 9 (26)                  |
| CSF t-tau (pg/mL)             | 387.3 $\pm$ 120.9 | 364.6 $\pm$ 98.1                 | 386.4 $\pm$ 152.3                | 391.0 $\pm$ 111.8                | 443.4 $\pm$ 153.8                   | 405.6 $\pm$ 132.7       |
| CSF p-tau181 (pg/mL)          | 38.7 $\pm$ 13.0   | 39.1 $\pm$ 13.0                  | 38.6 $\pm$ 16.6                  | 39.5 $\pm$ 12.6                  | 43.2 $\pm$ 15.9                     | 40.7 $\pm$ 14.2         |
| CSF t-tau/A $\beta$ 42        | 0.6 $\pm$ 0.2     | 0.6 $\pm$ 0.2                    | 0.6 $\pm$ 0.1                    | 0.5 $\pm$ 0.1                    | 0.6 $\pm$ 0.2                       | 0.6 $\pm$ 0.2           |

**eTable 2.** MAD baseline characteristics: Tau PET substudy participants with baseline and end-of-MAD scans

Values are presented as mean ± standard deviation. Percentages may not total 100 due to rounding.

|                             | Placebo                 | BIIB080                          |                                    |                        |
|-----------------------------|-------------------------|----------------------------------|------------------------------------|------------------------|
|                             | Cohort D, Placebo (N=4) | Cohort C, 60mg every 4 wks (N=3) | Cohort D, 115mg every 12 wks (N=6) | BIIB080 combined (N=9) |
| Age (years)                 | 67.3 ± 3.3              | 61.3 ± 10.6                      | 67.2 ± 8.6                         | 65.2 ± 9.1             |
| Sex                         |                         |                                  |                                    |                        |
| Female (%)                  | 2 (50)                  | 3 (100)                          | 2 (33)                             | 5 (56)                 |
| Male (%)                    | 2 (50)                  | 0 (0)                            | 4 (67)                             | 4 (44)                 |
| Race – white (%)            | 4 (100)                 | 3 (100)                          | 6 (100)                            | 9 (100)                |
| MMSE Total Score            | 24.5 ± 1.7              | 24.7 ± 3.2                       | 23.5 ± 2.5                         | 23.9 ± 2.6             |
| RBANS Total Score           | 64.0 ± 8.3              | 74.0 ± 2.7                       | 74.7 ± 12.2                        | 74.4 ± 9.7             |
| CDR Global Score (%)        |                         |                                  |                                    |                        |
| 0.5                         | 4 (100)                 | 3 (100)                          | 4 (67)                             | 7 (78)                 |
| 1                           | 0 (100)                 | 0 (0)                            | 2 (33)                             | 2 (22)                 |
| CDR Sum of Boxes            | 3.3 ± 0.3               | 2.8 ± 0.3                        | 3.5 ± 1.3                          | 3.3 ± 1.1              |
| Concomitant medications (%) |                         |                                  |                                    |                        |
| Anticholinesterases         | 2 (50)                  | 1 (33)                           | 5 (83)                             | 6 (67)                 |
| Memantine                   | 0 (0)                   | 1 (33)                           | 2 (33)                             | 3 (33)                 |
| Estrogen replacement        | 0 (0)                   | 1 (33)                           | 1 (17)                             | 2 (22)                 |
| ApoE ε4 carrier (%)         | 4 (100)                 | 2 (66)                           | 4 (66)                             | 6 (66)                 |
| Heterozygous                | 3 (75)                  | 1 (33)                           | 2 (33)                             | 3 (33)                 |
| Homozygous                  | 1 (25)                  | 1 (33)                           | 2 (33)                             | 3 (33)                 |
| Non-carrier                 | 0 (0)                   | 1 (33)                           | 2 (33)                             | 3 (33)                 |
| CSF t-tau (pg/mL)           | 445.0 ± 95.2            | 413.9 ± 167.6                    | 465.7 ± 178.1                      | 448.4 ± 165.9          |
| CSF p-tau181 (pg/mL)        | 42.5 ± 8.9              | 43.3 ± 20.4                      | 45.7 ± 18.9                        | 44.9 ± 18.2            |
| CSF t-tau/Aβ42              | 0.68 ± 0.2              | 0.63 ± 0.2                       | 0.68 ± 0.3                         | 0.67 ± 0.2             |
| Tau PET SUVR                |                         |                                  |                                    |                        |
| Medial Temporal Composite   | 2.73 ± 0.47             | 1.97 ± 0.70                      | 2.26 ± 0.56                        | 2.16 ± 0.58            |
| Temporal Composite          | 3.22 ± 0.74             | 2.17 ± 0.96                      | 2.48 ± 0.87                        | 2.38 ± 0.85            |
| Frontal Composite           | 2.27 ± 0.75             | 1.64 ± 0.67                      | 1.40 ± 0.46                        | 1.48 ± 0.51            |
| Parietal Composite          | 2.73 ± 0.65             | 2.10 ± 0.99                      | 1.91 ± 0.73                        | 1.97 ± 0.77            |
| Occipital Composite         | 2.69 ± 0.85             | 1.85 ± 0.94                      | 1.93 ± 0.88                        | 1.90 ± 0.84            |
| Cingulate Composite         | 2.03 ± 0.57             | 1.55 ± 0.53                      | 1.25 ± 0.34                        | 1.35 ± 0.41            |

**eTable 3.** MAD baseline characteristics: Tau PET substudy participants with baseline and end-of-LTE scans

Values are presented as mean ± standard deviation. Percentages may not total 100 due to rounding.

|                             | Placebo                                       | BIIB080                                               |                                                          | All Combined  |
|-----------------------------|-----------------------------------------------|-------------------------------------------------------|----------------------------------------------------------|---------------|
|                             | Cohort D (Placebo → 115mg every 12 wks) (N=2) | Cohort C (60mg every 4 wks → 60mg every 12 wks) (N=2) | Cohort D (115mg every 12 wks → 115mg every 12 wks) (N=8) | (N=12)        |
| Age (years)                 | 69.0 ± 2.8                                    | 60.5 ± 14.9                                           | 67.4 ± 7.7                                               | 66.5 ± 8.2    |
| Sex                         |                                               |                                                       |                                                          |               |
| Female (%)                  | 0 (0)                                         | 2 (100)                                               | 3 (38)                                                   | 5 (42)        |
| Male (%)                    | 2 (100)                                       | 0 (0)                                                 | 5 (63)                                                   | 7 (58)        |
| Race – white (%)            | 2 (100)                                       | 2 (100)                                               | 8 (100)                                                  | 12 (100)      |
| MMSE Total Score            | 26.0 ± 0.0                                    | 23.5 ± 3.5                                            | 22.8 ± 2.6                                               | 23.4 ± 2.6    |
| RBANS Total Score           | 71.0 ± 0.0                                    | 74.5 ± 3.5                                            | 71.1 ± 12.6                                              | 71.7 ± 10.2   |
| CDR Global Score (%)        |                                               |                                                       |                                                          |               |
| 0.5                         | 2 (100)                                       | 2 (100)                                               | 6 (75)                                                   | 10 (83)       |
| 1                           | 0 (0)                                         | 0 (0)                                                 | 2 (25)                                                   | 2 (17)        |
| CDR Sum of Boxes            | 3.0 ± 0.0                                     | 2.8 ± 0.4                                             | 3.5 ± 1.2                                                | 3.3 ± 1.0     |
| Concomitant medications (%) |                                               |                                                       |                                                          |               |
| Anticholinesterases         | 1 (50)                                        | 1 (50)                                                | 6 (75)                                                   | 8 (67)        |
| Memantine                   | 0 (0)                                         | 1 (50)                                                | 2 (25)                                                   | 3 (25)        |
| Estrogen replacement        | 0 (0)                                         | 1 (50)                                                | 1 (13)                                                   | 2 (17)        |
| ApoE ε4 carrier (%)         | 2 (100)                                       | 1 (50)                                                | 6 (75)                                                   | 9 (75)        |
| Heterozygous                | 2 (100)                                       | 1 (50)                                                | 4 (50)                                                   | 7 (58)        |
| Homozygous                  | 0 (0)                                         | 0 (0)                                                 | 2 (25)                                                   | 2 (17)        |
| Non-carrier                 | 0 (0)                                         | 1 (50)                                                | 2 (25)                                                   | 3 (25)        |
| CSF t-tau (pg/mL)           | 403.8 ± 86.1                                  | 510.4 ± 19.3                                          | 457.4 ± 163.3                                            | 457.3 ± 136.8 |
| CSF p-tau181 (pg/mL)        | 39.5 ± 10.2                                   | 55.1 ± 1.4                                            | 44.7 ± 17.6                                              | 45.5 ± 15.2   |
| CSF t-tau/Aβ42              | 0.56 ± 0.01                                   | 0.73 ± 0.15                                           | 0.67 ± 0.26                                              | 0.66 ± 0.22   |
| Tau PET SUVR                |                                               |                                                       |                                                          |               |
| Medial Temporal Composite   | 2.36 ± 0.12                                   | 2.37 ± 0.17                                           | 2.39 ± 0.53                                              | 2.38 ± 0.43   |
| Temporal Composite          | 2.61 ± 0.09                                   | 2.69 ± 0.48                                           | 2.61 ± 0.79                                              | 2.63 ± 0.65   |
| Frontal Composite           | 1.67 ± 0.49                                   | 2.00 ± 0.33                                           | 1.50 ± 0.47                                              | 1.61 ± 0.46   |
| Parietal Composite          | 2.23 ± 0.04                                   | 2.37 ± 1.25                                           | 2.30 ± 1.11                                              | 2.30 ± 0.96   |
| Occipital Composite         | 2.48 ± 1.08                                   | 2.10 ± 1.18                                           | 2.31 ± 1.23                                              | 2.30 ± 1.10   |
| Cingulate Composite         | 1.74 ± 0.56                                   | 1.85 ± 0.12                                           | 1.36 ± 0.39                                              | 1.51 ± 0.42   |

**eTable 4.** MAD baseline characteristics: LTE participants

Values are presented as mean ± standard deviation. Percentages may not total 100 due to rounding.

|                                | Placebo → BIIB080                                         |                                                        | BIIB080 throughout                                             |                                                                   |                                                                   |                                                                       | All Combined<br>(N=33) |
|--------------------------------|-----------------------------------------------------------|--------------------------------------------------------|----------------------------------------------------------------|-------------------------------------------------------------------|-------------------------------------------------------------------|-----------------------------------------------------------------------|------------------------|
|                                | Cohort A+B+C<br>(Placebo →<br>60mg every 12<br>wks) (N=4) | Cohort D<br>(Placebo →<br>115mg every 12<br>wks) (N=4) | Cohort A (10mg<br>every 4 wks →<br>60mg every 12<br>wks) (N=3) | Cohort B<br>(30mg every 4<br>wks → 60mg<br>every 12 wks)<br>(N=5) | Cohort C<br>(60mg every 4<br>wks → 60mg<br>every 12 wks)<br>(N=7) | Cohort D<br>(115mg every 12<br>wks → 115mg<br>every 12 wks)<br>(N=10) |                        |
| Age (years)                    | 61.8 ± 3.1                                                | 67.3 ± 3.3                                             | 63.3 ± 7.2                                                     | 63.6 ± 5.6                                                        | 65.4 ± 7.7                                                        | 67.8 ± 6.9                                                            | 65.5 ± 6.2             |
| Sex                            |                                                           |                                                        |                                                                |                                                                   |                                                                   |                                                                       |                        |
| Female (%)                     | 1 (25)                                                    | 2 (50)                                                 | 1 (33)                                                         | 3 (60)                                                            | 4 (57)                                                            | 5 (50)                                                                | 16 (48)                |
| Male (%)                       | 3 (75)                                                    | 2 (50)                                                 | 2 (67)                                                         | 2 (40)                                                            | 3 (43)                                                            | 5 (50)                                                                | 17 (52)                |
| Race – white (%)               | 4 (100)                                                   | 4 (100)                                                | 3 (100)                                                        | 5 (100)                                                           | 7 (100)                                                           | 10 (100)                                                              | 33 (100)               |
| MMSE Total Score               | 23.8 ± 1.7                                                | 24.5 ± 1.7                                             | 21.3 ± 1.5                                                     | 24.6 ± 1.5                                                        | 24.7 ± 2.2                                                        | 22.9 ± 2.3                                                            | 23.7 ± 2.1             |
| RBANS Total Score              | 59.8 ± 7.9                                                | 64.0 ± 8.3                                             | 55.7 ± 6.1                                                     | 70.6 ± 13.0                                                       | 70.7 ± 9.7                                                        | 70.6 ± 14.4                                                           | 67.2 ± 11.9            |
| CDR Global Score<br>(%)        |                                                           |                                                        |                                                                |                                                                   |                                                                   |                                                                       |                        |
| 0.5                            | 2 (50)                                                    | 4 (100)                                                | 0 (0)                                                          | 2 (40)                                                            | 7 (100)                                                           | 8 (80)                                                                | 23 (70)                |
| 1                              | 2 (50)                                                    | 0 (0)                                                  | 3 (100)                                                        | 3 (60)                                                            | 0 (0)                                                             | 2 (20)                                                                | 10 (30)                |
| CDR Sum of Boxes               | 4.4 ± 1.1                                                 | 3.3 ± 0.3                                              | 4.5 ± 0.5                                                      | 4.9 ± 1.0                                                         | 2.9 ± 0.7                                                         | 3.4 ± 1.2                                                             | 3.7 ± 1.1              |
| Concomitant<br>medications (%) |                                                           |                                                        |                                                                |                                                                   |                                                                   |                                                                       |                        |
| Anticholinesterases            | 4 (100)                                                   | 2 (50)                                                 | 2 (67)                                                         | 4 (80)                                                            | 5 (71)                                                            | 8 (80)                                                                | 25 (76)                |
| Memantine                      | 1 (25)                                                    | 0 (0)                                                  | 2 (67)                                                         | 3 (60)                                                            | 3 (43)                                                            | 3 (30)                                                                | 12 (36)                |
| Estrogen replacement           | 0 (0)                                                     | 0 (0)                                                  | 1 (33)                                                         | 1 (20)                                                            | 1 (14)                                                            | 2 (20)                                                                | 5 (15)                 |
| ApoE ε4 carrier (%)            | 1 (25)                                                    | 4 (100)                                                | 3 (100)                                                        | 3 (60)                                                            | 5 (71)                                                            | 8 (80)                                                                | 24 (73)                |
| Heterozygous                   | 1 (25)                                                    | 3 (75)                                                 | 2 (67)                                                         | 3 (60)                                                            | 3 (43)                                                            | 6 (60)                                                                | 18 (55)                |
| Homozygous                     | 0 (0)                                                     | 1 (25)                                                 | 1 (33)                                                         | 0 (0)                                                             | 2 (29)                                                            | 2 (20)                                                                | 6 (18)                 |
| Non-carrier                    | 3 (75)                                                    | 0 (0)                                                  | 0 (0)                                                          | 2 (40)                                                            | 2 (29)                                                            | 2 (20)                                                                | 9 (27)                 |
| CSF t-tau (pg/mL)              | 403.6 ± 128.6                                             | 445.0 ± 95.2                                           | 389.4 ± 146.5                                                  | 331.8 ± 81.5                                                      | 424.5 ± 99.3                                                      | 443.4 ± 158.1                                                         | 412.9 ± 122.4          |
| CSF p-tau181<br>(pg/mL)        | 40.5 ± 14.3                                               | 42.5 ± 8.9                                             | 42.2 ± 19.5                                                    | 32.5 ± 8.0                                                        | 43.5 ± 10.7                                                       | 43.5 ± 17.1                                                           | 41.2 ± 13.3            |
| CSF t-tau/Aβ42                 | 0.53 ± 0.16                                               | 0.68 ± 0.22                                            | 0.59 ± 0.25                                                    | 0.52 ± 0.08                                                       | 0.56 ± 0.14                                                       | 0.65 ± 0.24                                                           | 0.60 ± 0.19            |

**eTable 5.** Number of participants in each treatment group analyzed at each timepoint for CSF t-tau and p-tau181.

| Group                                              | Study Week (N per group) |    |    |    |    |    |    |    |    |    |    |    |    |
|----------------------------------------------------|--------------------------|----|----|----|----|----|----|----|----|----|----|----|----|
|                                                    | 0                        | 4  | 8  | 12 | 16 | 20 | 28 | 36 | 48 | 60 | 72 | 84 | 96 |
| Cohort A+B+C (Placebo → 60mg every 12 wks)         | 7                        | 7  | 7  | 7  | 5  | 6  | 3  | 5  | 4  | 3  | 2  | 2  | 2  |
| Cohort A (10mg every 4 wks → 60mg every 12 wks)    | 6                        | 6  | 6  | 6  | 6  | 5  |    | 3  | 3  | 3  | 2  | 2  | 3  |
| Cohort B (30mg every 4 wks → 60mg every 12 wks)    | 6                        | 6  | 6  | 6  | 6  | 5  |    | 5  | 5  | 5  | 5  | 5  | 4  |
| Cohort C (60mg every 4 wks → 60mg every 12 wks)    | 9                        | 9  | 9  | 9  | 1  | 7  | 8  | 7  | 7  | 7  | 7  | 7  | 7  |
| Cohort D (Placebo → 115mg every 12 wks)            | 5                        | NA | NA | 5  | NA | 4  | 3  | 4  | 4  | 2  | 2  | 2  | 2  |
| Cohort D (115mg every 12 wks → 115mg every 12 wks) | 13                       | NA | NA | 12 | NA | 11 | 12 | 10 | 10 | 10 | 10 | 10 | 11 |



**eTable 6.** Summary statistics for % change from baseline\* of CSF t-tau

|                                                     | <b>Cohort A+B+C</b><br>(Placebo → 60mg<br>every 12 wks) | <b>Cohort D</b> (Placebo<br>→ 115mg every 12<br>wks) | <b>Cohort A</b> (10mg<br>every 4 wks → 60mg<br>every 12 wks) | <b>Cohort B</b> (30mg<br>every 4 wks → 60mg<br>every 12 wks) | <b>Cohort C</b> (60mg<br>every 4 wks → 60mg<br>every 12 wks) | <b>Cohort D</b> (115mg<br>every 12 wks → 115<br>mg every 12 wks) |
|-----------------------------------------------------|---------------------------------------------------------|------------------------------------------------------|--------------------------------------------------------------|--------------------------------------------------------------|--------------------------------------------------------------|------------------------------------------------------------------|
| <b>Week 4</b>                                       |                                                         |                                                      |                                                              |                                                              |                                                              |                                                                  |
| N                                                   | 7                                                       | 0                                                    | 6                                                            | 6                                                            | 9                                                            | 0                                                                |
| Mean (SD)                                           | -1.5 (3.3)                                              |                                                      | -5.0 (3.0)                                                   | -6.3 (3.5)                                                   | -8.9 (5.5)                                                   |                                                                  |
| Median (Q1, Q3)<br>(Min, Max)                       | -2.9 (-3.9, 1.7)<br>(-4.5, 4.1)                         |                                                      | -5.2 (-7.8, -2.1)<br>(-8.3, -1.5)                            | -6.0 (-9.7, -3.2)<br>(-10.0, -2.8)                           | -9.5 (-10.8, -5.5)<br>(-18.2, 0.6)                           |                                                                  |
| <b>Week 8</b>                                       |                                                         |                                                      |                                                              |                                                              |                                                              |                                                                  |
| N                                                   | 7                                                       | 0                                                    | 6                                                            | 6                                                            | 9                                                            | 0                                                                |
| Mean (SD)                                           | -1.0 (2.9)                                              |                                                      | -13.2 (11.8)                                                 | -15.9 (5.0)                                                  | -20.2 (6.0)                                                  |                                                                  |
| Median (Q1, Q3)<br>(Min, Max)                       | -0.9 (-3.7, 1.8)<br>(-4.4, 3.4)                         |                                                      | -9.9 (-15.6, -7.7)<br>(-35.2, -0.7)                          | -14.3 (-21.7, -11.7)<br>(-22.2, -11.4)                       | -19.4 (-21.9, -18.9)<br>(-32.6, -10.4)                       |                                                                  |
| <b>Week 12</b>                                      |                                                         |                                                      |                                                              |                                                              |                                                              |                                                                  |
| N                                                   | 7                                                       | 5                                                    | 6                                                            | 6                                                            | 9                                                            | 12                                                               |
| Mean (SD)                                           | -0.4 (5.1)                                              | -2.2 (14.8)                                          | -15.8 (7.4)                                                  | -27.3 (6.1)                                                  | -31.9 (5.7)                                                  | -27.2 (12.2)                                                     |
| Median (Q1, Q3)<br>(Min, Max)                       | -2.1 (-5.2, 5.0)<br>(-5.4, 7.1)                         | 4.8 (2.2, 4.9)<br>(-28.7, 5.6)                       | -17.2 (-20.0, -8.6)<br>(-25.5, -6.3)                         | -24.5 (-31.9, -23.9)<br>(-37.6, -21.7)                       | -32.0 (-36.1, -27.8)<br>(-41.8, -23.7)                       | -29.2 (-36.8, -20.9)<br>(-40.6, -0.4)                            |
| <b>Week 16</b>                                      |                                                         |                                                      |                                                              |                                                              |                                                              |                                                                  |
| N                                                   | 5                                                       | 0                                                    | 6                                                            | 6                                                            | 1                                                            | 0                                                                |
| Mean (SD)                                           | -2.4 (4.4)                                              |                                                      | -25.6 (15.4)                                                 | -34.9 (7.2)                                                  | -50.1 ( )                                                    |                                                                  |
| Median (Q1, Q3)<br>(Min, Max)                       | -3.3 (-5.6, 0.1)<br>(-6.8, 3.8)                         |                                                      | -27.3 (-34.1, -12.1)<br>(-47.9, -5.0)                        | -34.5 (-42.7, -27.0)<br>(-43.5, -27.0)                       | -50.1 (-50.1, -50.1)<br>(-50.1, -50.1)                       |                                                                  |
| <b>Wee (P)</b>                                      |                                                         |                                                      |                                                              |                                                              |                                                              |                                                                  |
| N                                                   | 6                                                       | 4                                                    | 5                                                            | 5                                                            | 7                                                            | 11                                                               |
| Mean (SD)                                           | -0.6 (5.2)                                              | -2.5 (18.5)                                          | -29.5 (8.0)                                                  | -39.7 (5.8)                                                  | -48.8 (6.9)                                                  | -41.9 (15.4)                                                     |
| Median (Q1, Q3)<br>(Min, Max)                       | -2.1 (-3.5, -0.2)<br>(-5.0, 9.5)                        | 0.9 (-15.3, 10.2)<br>(-27.9, 15.9)                   | -30.5 (-35.4, -30.0)<br>(-35.7, -16.0)                       | -38.1 (-41.6, -37.8)<br>(-48.4, -32.6)                       | -45.9 (-51.6, -43.6)<br>(-62.5, -43.3)                       | -47.6 (-50.3, -33.4)<br>(-60.0, -5.0)                            |
| <b>Week 28</b>                                      |                                                         |                                                      |                                                              |                                                              |                                                              |                                                                  |
| N                                                   | 3                                                       | 3                                                    | 0                                                            | 0                                                            | 8                                                            | 12                                                               |
| Mean (SD)                                           | 0.7 (13.9)                                              | -4.4 (21.8)                                          |                                                              |                                                              | -55.4 (7.3)                                                  | -49.2 (16.0)                                                     |
| Median (Q1, Q3)<br>(Min, Max)                       | -2.8 (-11.2, 16.0)<br>(-11.2, 16.0)                     | 2.7 (-28.8, 13.0)<br>(-28.8, 13.0)                   |                                                              |                                                              | -56.1 (-58.9, -51.8)<br>(-67.1, -42.6)                       | -52.6 (-59.3, -42.7)<br>(-69.4, -11.7)                           |
| <b>Week 36<sup>‡</sup> (Cohorts A &amp; B only)</b> |                                                         |                                                      |                                                              |                                                              |                                                              |                                                                  |
| N                                                   | 1                                                       | 0                                                    | 1                                                            | 1                                                            | 0                                                            | 0                                                                |
| Mean (SD)                                           | 1.1 ( )                                                 |                                                      | -36.7 ( )                                                    | -47.2 ( )                                                    |                                                              |                                                                  |
| Median (Q1, Q3)<br>(Min, Max)                       | 1.1 (1.1, 1.1)<br>(1.1, 1.1)                            |                                                      | -36.7 (-36.7, -36.7)<br>(-36.7, -36.7)                       | -47.2 (-47.2, -47.2)<br>(-47.2, -47.2)                       |                                                              |                                                                  |
| <b>Week 36 / LTE Week 0<sup>‡</sup></b>             |                                                         |                                                      |                                                              |                                                              |                                                              |                                                                  |

|                                    |                                        |                                        |                                        |                                        |                                        |                                        |
|------------------------------------|----------------------------------------|----------------------------------------|----------------------------------------|----------------------------------------|----------------------------------------|----------------------------------------|
| N                                  | 4                                      | 4                                      | 3                                      | 5                                      | 7                                      | 10                                     |
| Mean (SD)                          | 0.5 (11.6)                             | -4.7 (17.0)                            | 1.4 (41.7)                             | -30.9 (12.1)                           | -56.2 (7.7)                            | -50.6 (20.3)                           |
| Median (Q1, Q3)<br>(Min, Max)      | -3.1 (-7.6, 8.7)<br>(-8.5, 16.9)       | 2.2 (-15.1, 5.6)<br>(-29.8, 6.5)       | -22.3 (-23.0, 49.6)<br>(-23.0, 49.6)   | -29.7 (-35.0, -22.9)<br>(-49.2, -18.0) | -56.7 (-59.5, -50.4)<br>(-68.9, -44.3) | -57.2 (-64.1, -31.8)<br>(-72.2, -8.3)  |
| Week 48 / LTE Week 12              |                                        |                                        |                                        |                                        |                                        |                                        |
| N                                  | 4                                      | 4                                      | 3                                      | 5                                      | 7                                      | 10                                     |
| Mean (SD)                          | -31.1 (13.1)                           | -34.7 (13.8)                           | -12.5 (50.0)                           | -45.9 (8.0)                            | -64.0 (6.5)                            | -54.7 (18.5)                           |
| Median (Q1, Q3)<br>(Min, Max)      | -32.4 (-40.7, -21.5)<br>(-45.2, -14.2) | -33.4 (-43.3, -26.0)<br>(-52.8, -19.2) | -38.4 (-44.2, 45.1)<br>(-44.2, 45.1)   | -44.0 (-52.4, -42.5)<br>(-55.2, -35.3) | -63.5 (-67.4, -59.7)<br>(-74.7, -53.9) | -62.6 (-66.6, -51.9)<br>(-74.6, -16.2) |
| Week 60 / LTE Week 24              |                                        |                                        |                                        |                                        |                                        |                                        |
| N                                  | 3                                      | 2                                      | 3                                      | 5                                      | 7                                      | 10                                     |
| Mean (SD)                          | -44.2 (24.2)                           | -49.5 (3.9)                            | -22.0 (56.1)                           | -52.8 (10.0)                           | -65.8 (7.1)                            | -59.5 (18.4)                           |
| Median (Q1, Q3)<br>(Min, Max)      | -55.1 (-61.0, -16.6)<br>(-61.0, -16.6) | -49.5 (-52.3, -46.8)<br>(-52.3, -46.8) | -49.2 (-59.2, 42.5)<br>(-59.2, 42.5)   | -50.4 (-61.9, -48.5)<br>(-63.6, -39.4) | -64.6 (-71.4, -60.0)<br>(-78.5, -58.0) | -65.4 (-69.7, -59.8)<br>(-78.5, -15.6) |
| Week 72 / LTE Week 36              |                                        |                                        |                                        |                                        |                                        |                                        |
| N                                  | 2                                      | 2                                      | 2                                      | 5                                      | 7                                      | 10                                     |
| Mean (SD)                          | -58.5 (13.5)                           | -56.1 (4.4)                            | -43.9 (12.8)                           | -56.6 (5.4)                            | -66.6 (6.9)                            | -60.4 (19.3)                           |
| Median (Q1, Q3)<br>(Min, Max)      | -58.5 (-68.0, -48.9)<br>(-68.0, -48.9) | -56.1 (-59.2, -53.0)<br>(-59.2, -53.0) | -43.9 (-53.0, -34.8)<br>(-53.0, -34.8) | -54.2 (-61.0, -54.2)<br>(-63.3, -50.1) | -66.1 (-72.5, -60.2)<br>(-78.2, -57.9) | -67.2 (-69.8, -63.6)<br>(-79.6, -15.4) |
| Week 84 / LTE Week 48              |                                        |                                        |                                        |                                        |                                        |                                        |
| N                                  | 2                                      | 2                                      | 2                                      | 5                                      | 7                                      | 10                                     |
| Mean (SD)                          | -58.1 (19.9)                           | -62.8 (1.6)                            | -63.1 (5.5)                            | -59.4 (9.3)                            | -67.1 (6.4)                            | -62.1 (17.1)                           |
| Median (Q1, Q3)<br>(Min, Max)      | -58.1 (-72.2, -44.0)<br>(-72.2, -44.0) | -62.8 (-63.9, -61.7)<br>(-63.9, -61.7) | -63.1 (-67.0, -59.2)<br>(-67.0, -59.2) | -57.7 (-67.0, -55.8)<br>(-69.9, -46.7) | -66.1 (-71.8, -62.9)<br>(-78.9, -59.3) | -67.9 (-70.6, -63.9)<br>(-79.8, -22.9) |
| Week 96 / LTE Week 60 <sup>#</sup> |                                        |                                        |                                        |                                        |                                        |                                        |
| N                                  | 2                                      | 1                                      | 3                                      | 4                                      | 7                                      | 9                                      |
| Mean (SD)                          | -65.4 (11.6)                           | -69.5 ( )                              | -29.9 (58.1)                           | -63.8 (6.2)                            | -67.6 (7.1)                            | -67.6 (9.6)                            |
| Median (Q1, Q3)<br>(Min, Max)      | -65.4 (-73.6, -57.2)<br>(-73.6, -57.2) | -69.5 (-69.5, -69.5)<br>(-69.5, -69.5) | -56.7 (-69.8, 36.8)<br>(-69.8, 36.8)   | -63.5 (-69.1, -58.6)<br>(-70.7, -57.6) | -65.8 (-71.4, -62.4)<br>(-80.6, -59.3) | -69.7 (-71.7, -65.8)<br>(-79.2, -44.7) |
| LTE Week 64 <sup>#</sup>           |                                        |                                        |                                        |                                        |                                        |                                        |
| N                                  | 0                                      | 1                                      | 0                                      | 0                                      | 0                                      | 2                                      |
| Mean (SD)                          |                                        | -63.8 ( )                              |                                        |                                        |                                        | -45.2 (27.9)                           |
| Median (Q1, Q3)<br>(Min, Max)      |                                        | -63.8 (-63.8, -63.8)<br>(-63.8, -63.8) |                                        |                                        |                                        | -45.2 (-65.0, -25.5)<br>(-65.0, -25.5) |

\*Baseline was defined as the average of the screening and Day 1 pre-dose values in the MAD period.

<sup>#</sup>There was a variable gap between the end of the MAD and beginning of the LTE for Cohorts A & B. These subjects had an end-of-MAD visit at Week 36. Those who returned to enter the LTE had a start-of-LTE visit upon commencing the LTE. Subjects in Cohorts C & D moved seamlessly from the MAD to LTE and therefore have a single Week 36 / LTE Week 0 visit. These datapoints were collapsed into a single datapoint for visualization in Figure 2.

<sup>#</sup>These datapoints were collapsed into a single datapoint for visualization in Figure 2.

**eTable 7.** Summary statistics for % change from baseline\* of CSF p-tau181

|                                                     | <b>Cohort A+B+C</b><br>(Placebo → 60mg<br>every 12 wks) | <b>Cohort D (Placebo</b><br>→ 115mg every 12<br>wks) | <b>Cohort A (10mg</b><br>every 4 wks → 60mg<br>every 12 wks) | <b>Cohort B (30mg</b><br>every 4 wks → 60mg<br>every 12 wks) | <b>Cohort C (60mg</b><br>every 4 wks → 60mg<br>every 12 wks) | <b>Cohort D (115mg</b><br>every 12 wks → 115<br>mg every 12 wks) |
|-----------------------------------------------------|---------------------------------------------------------|------------------------------------------------------|--------------------------------------------------------------|--------------------------------------------------------------|--------------------------------------------------------------|------------------------------------------------------------------|
| <b>Week 4</b>                                       |                                                         |                                                      |                                                              |                                                              |                                                              |                                                                  |
| N                                                   | 7                                                       | 0                                                    | 6                                                            | 6                                                            | 9                                                            | 0                                                                |
| Mean (SD)                                           | -0.7 (2.8)                                              |                                                      | -7.7 (3.5)                                                   | -7.6 (3.5)                                                   | -10.1 (6.8)                                                  |                                                                  |
| Median (Q1, Q3)                                     | -1.7 (-3.1, 2.9)                                        |                                                      | -8.9 (-10.1, -3.9)                                           | -7.8 (-9.7, -3.9)                                            | -9.7 (-13.7, -9.3)                                           |                                                                  |
| (Min, Max)                                          | (-3.4, 3.6)                                             |                                                      | (-11.3, -3.0)                                                | (-12.5, -3.8)                                                | (-20.5, 2.0)                                                 |                                                                  |
| <b>Week 8</b>                                       |                                                         |                                                      |                                                              |                                                              |                                                              |                                                                  |
| N                                                   | 7                                                       | 0                                                    | 6                                                            | 6                                                            | 9                                                            | 0                                                                |
| Mean (SD)                                           | 1.0 (4.4)                                               |                                                      | -16.6 (12.9)                                                 | -19.8 (4.6)                                                  | -24.2 (7.1)                                                  |                                                                  |
| Median (Q1, Q3)                                     | -0.2 (-1.4, 5.4)                                        |                                                      | -12.9 (-19.4, -6.6)                                          | -18.2 (-24.8, -17.4)                                         | -24.7 (-26.8, -22.3)                                         |                                                                  |
| (Min, Max)                                          | (-6.2, 6.4)                                             |                                                      | (-41.0, -6.6)                                                | (-26.0, -14.2)                                               | (-38.2, -12.8)                                               |                                                                  |
| <b>Week 12</b>                                      |                                                         |                                                      |                                                              |                                                              |                                                              |                                                                  |
| N                                                   | 7                                                       | 5                                                    | 6                                                            | 6                                                            | 9                                                            | 12                                                               |
| Mean (SD)                                           | 0.9 (5.9)                                               | -7.3 (15.2)                                          | -19.9 (7.7)                                                  | -31.6 (7.0)                                                  | -36.6 (6.1)                                                  | -34.2 (13.7)                                                     |
| Median (Q1, Q3)                                     | 1.9 (-5.3, 6.8)                                         | -1.4 (-2.7, 0.5)                                     | -18.8 (-27.1, -12.3)                                         | -31.5 (-35.8, -24.5)                                         | -36.4 (-40.7, -35.4)                                         | -39.3 (-44.4, -25.4)                                             |
| (Min, Max)                                          | (-5.4, 7.0)                                             | (-34.3, 1.4)                                         | (-30.4, -12.0)                                               | (-42.3, -23.8)                                               | (-45.3, -27.1)                                               | (-49.0, -7.1)                                                    |
| <b>Week 16</b>                                      |                                                         |                                                      |                                                              |                                                              |                                                              |                                                                  |
| N                                                   | 5                                                       | 0                                                    | 6                                                            | 6                                                            | 1                                                            | 0                                                                |
| Mean (SD)                                           | -3.2 (5.1)                                              |                                                      | -31.1 (16.0)                                                 | -39.6 (7.5)                                                  | -53.5 ( )                                                    |                                                                  |
| Median (Q1, Q3)                                     | -4.9 (-7.2, 0.4)                                        |                                                      | -31.1 (-42.9, -15.4)                                         | -41.7 (-45.5, -31.7)                                         | -53.5 (-53.5, -53.5)                                         |                                                                  |
| (Min, Max)                                          | (-8.1, 3.6)                                             |                                                      | (-53.8, -12.5)                                               | (-47.7, -29.2)                                               | (-53.5, -53.5)                                               |                                                                  |
| <b>Week 20</b>                                      |                                                         |                                                      |                                                              |                                                              |                                                              |                                                                  |
| N                                                   | 6                                                       | 4                                                    | 5                                                            | 5                                                            | 7                                                            | 11                                                               |
| Mean (SD)                                           | -0.1 (5.0)                                              | -6.7 (17.9)                                          | -35.0 (8.1)                                                  | -43.8 (7.2)                                                  | -52.0 (7.6)                                                  | -48.5 (15.2)                                                     |
| Median (Q1, Q3)                                     | -1.8 (-2.8, 5.8)                                        | -1.2 (-18.9, 5.5)                                    | -34.8 (-39.6, -34.0)                                         | -46.2 (-47.7, -41.6)                                         | -51.3 (-55.1, -45.9)                                         | -55.2 (-57.2, -39.4)                                             |
| (Min, Max)                                          | (-6.2, 6.2)                                             | (-32.2, 7.8)                                         | (-44.1, -22.5)                                               | (-51.2, -32.4)                                               | (-66.8, -44.3)                                               | (-67.2, -14.2)                                                   |
| <b>Week 28</b>                                      |                                                         |                                                      |                                                              |                                                              |                                                              |                                                                  |
| N                                                   | 3                                                       | 3                                                    | 0                                                            | 0                                                            | 8                                                            | 12                                                               |
| Mean (SD)                                           | 1.2 (16.2)                                              | -11.0 (19.8)                                         |                                                              |                                                              | -55.0 (8.7)                                                  | -49.9 (18.1)                                                     |
| Median (Q1, Q3)                                     | -2.6 (-12.8, 18.9)                                      | -1.1 (-33.9, 1.9)                                    |                                                              |                                                              | -55.6 (-59.1, -50.7)                                         | -56.3 (-61.7, -40.7)                                             |
| (Min, Max)                                          | (-12.8, 18.9)                                           | (-33.9, 1.9)                                         |                                                              |                                                              | (-69.5, -39.9)                                               | (-69.1, -11.6)                                                   |
| <b>Week 36<sup>‡</sup> (Cohorts A &amp; B only)</b> |                                                         |                                                      |                                                              |                                                              |                                                              |                                                                  |
| N                                                   | 1                                                       | 0                                                    | 1                                                            | 1                                                            | 0                                                            | 0                                                                |
| Mean (SD)                                           | -2.8 ( )                                                |                                                      | -37.8 ( )                                                    | -48.8 ( )                                                    |                                                              |                                                                  |
| Median (Q1, Q3)                                     | -2.8 (-2.8, -2.8)                                       |                                                      | -37.8 (-37.8, -37.8)                                         | -48.8 (-48.8, -48.8)                                         |                                                              |                                                                  |
| (Min, Max)                                          | (-2.8, -2.8)                                            |                                                      | (-37.8, -37.8)                                               | (-48.8, -48.8)                                               |                                                              |                                                                  |
| <b>Week 36 / LTE Week 0<sup>‡</sup></b>             |                                                         |                                                      |                                                              |                                                              |                                                              |                                                                  |

|                                    |                                        |                                        |                                        |                                        |                                        |                                        |
|------------------------------------|----------------------------------------|----------------------------------------|----------------------------------------|----------------------------------------|----------------------------------------|----------------------------------------|
| N                                  | 4                                      | 4                                      | 3                                      | 5                                      | 7                                      | 10                                     |
| Mean (SD)                          | 0.4 (13.7)                             | 2.1 (18.8)                             | 2.7 (40.3)                             | -23.7 (12.0)                           | -56.2 (7.7)                            | -45.8 (20.5)                           |
| Median (Q1, Q3)<br>(Min, Max)      | -4.5 (-8.7, 9.5)<br>(-9.6, 20.2)       | 10.1 (-8.2, 12.4)<br>(-25.9, 14.0)     | -18.0 (-23.0, 49.1)<br>(-23.0, 49.1)   | -25.2 (-25.7, -14.0)<br>(-41.9, -11.6) | -54.9 (-60.1, -53.3)<br>(-69.8, -44.3) | -52.9 (-59.3, -26.8)<br>(-69.1, -3.3)  |
| Week 48 / LTE Week 12              |                                        |                                        |                                        |                                        |                                        |                                        |
| N                                  | 4                                      | 4                                      | 3                                      | 5                                      | 7                                      | 10                                     |
| Mean (SD)                          | -30.5 (15.1)                           | -42.1 (12.9)                           | -14.2 (45.1)                           | -45.3 (7.1)                            | -59.2 (8.2)                            | -53.2 (17.1)                           |
| Median (Q1, Q3)<br>(Min, Max)      | -34.7 (-39.6, -21.4)<br>(-43.8, -8.8)  | -43.4 (-51.8, -32.4)<br>(-55.8, -25.7) | -38.0 (-42.3, 37.9)<br>(-42.3, 37.9)   | -43.0 (-50.6, -41.0)<br>(-54.6, -37.3) | -59.3 (-63.5, -54.1)<br>(-74.2, -48.1) | -59.9 (-63.6, -49.8)<br>(-73.2, -17.7) |
| Week 60 / LTE Week 24              |                                        |                                        |                                        |                                        |                                        |                                        |
| N                                  | 3                                      | 2                                      | 3                                      | 5                                      | 7                                      | 10                                     |
| Mean (SD)                          | -44.9 (20.4)                           | -52.9 (3.8)                            | -28.6 (46.1)                           | -52.0 (8.7)                            | -61.1 (9.0)                            | -58.5 (17.8)                           |
| Median (Q1, Q3)<br>(Min, Max)      | -54.2 (-58.9, -21.5)<br>(-58.9, -21.5) | -52.9 (-55.6, -50.1)<br>(-55.6, -50.1) | -53.7 (-56.6, 24.6)<br>(-56.6, 24.6)   | -49.3 (-60.5, -47.1)<br>(-61.4, -41.6) | -58.7 (-67.8, -53.5)<br>(-77.7, -51.7) | -62.8 (-67.9, -59.3)<br>(-77.6, -15.9) |
| Week 72 / LTE Week 36              |                                        |                                        |                                        |                                        |                                        |                                        |
| N                                  | 2                                      | 2                                      | 2                                      | 5                                      | 7                                      | 10                                     |
| Mean (SD)                          | -59.8 (7.8)                            | -58.9 (4.5)                            | -60.7 (2.0)                            | -56.7 (6.8)                            | -63.0 (8.3)                            | -60.0 (18.6)                           |
| Median (Q1, Q3)<br>(Min, Max)      | -59.8 (-65.3, -54.3)<br>(-65.3, -54.3) | -58.9 (-62.1, -55.7)<br>(-62.1, -55.7) | -60.7 (-62.2, -59.3)<br>(-62.2, -59.3) | -57.8 (-62.4, -53.7)<br>(-62.8, -46.6) | -61.7 (-71.6, -56.9)<br>(-76.6, -53.1) | -66.2 (-68.5, -64.9)<br>(-79.0, -18.7) |
| Week 84 / LTE Week 48              |                                        |                                        |                                        |                                        |                                        |                                        |
| N                                  | 2                                      | 2                                      | 2                                      | 5                                      | 7                                      | 10                                     |
| Mean (SD)                          | -64.0 (6.4)                            | -65.7 (0.2)                            | -65.3 (3.0)                            | -60.2 (7.6)                            | -65.2 (6.9)                            | -62.1 (15.9)                           |
| Median (Q1, Q3)<br>(Min, Max)      | -64.0 (-68.5, -59.5)<br>(-68.5, -59.5) | -65.7 (-65.9, -65.6)<br>(-65.9, -65.6) | -65.3 (-67.5, -63.2)<br>(-67.5, -63.2) | -56.2 (-67.1, -55.9)<br>(-69.5, -52.1) | -62.6 (-70.3, -59.6)<br>(-77.9, -58.4) | -67.8 (-70.1, -63.7)<br>(-79.0, -27.1) |
| Week 96 / LTE Week 60 <sup>#</sup> |                                        |                                        |                                        |                                        |                                        |                                        |
| N                                  | 2                                      | 1                                      | 3                                      | 4                                      | 7                                      | 9                                      |
| Mean (SD)                          | -69.0 (4.9)                            | -71.9 ( )                              | -41.9 (43.1)                           | -63.2 (7.2)                            | -65.5 (8.4)                            | -66.8 (10.3)                           |
| Median (Q1, Q3)<br>(Min, Max)      | -69.0 (-72.5, -65.6)<br>(-72.5, -65.6) | -71.9 (-71.9, -71.9)<br>(-71.9, -71.9) | -63.5 (-69.8, 7.7)<br>(-69.8, 7.7)     | -63.5 (-69.0, -57.3)<br>(-70.8, -54.8) | -60.6 (-71.1, -59.3)<br>(-80.2, -57.8) | -67.7 (-69.7, -65.7)<br>(-78.8, -42.3) |
| LTE Week 64 <sup>#</sup>           |                                        |                                        |                                        |                                        |                                        |                                        |
| N                                  | 0                                      | 1                                      | 0                                      | 0                                      | 0                                      | 2                                      |
| Mean (SD)                          |                                        | -62.0 ( )                              |                                        |                                        |                                        | -47.5 (23.7)                           |
| Median (Q1, Q3)<br>(Min, Max)      |                                        | -62.0 (-62.0, -62.0)<br>(-62.0, -62.0) |                                        |                                        |                                        | -47.5 (-64.2, -30.7)<br>(-64.2, -30.7) |

\*Baseline was defined as the average of the screening and Day 1 pre-dose values in the MAD period.

<sup>#</sup>There was a variable gap between the end of the MAD and beginning of the LTE for Cohorts A & B. These subjects had an end-of-MAD visit at Week 36. Those who returned to enter the LTE had a start-of-LTE visit upon commencing the LTE. Subjects in Cohorts C & D moved seamlessly from the MAD to LTE and therefore have a single Week 36 / LTE Week 0 visit. These datapoints were collapsed into a single datapoint for visualization in Figure 2.

<sup>#</sup>These datapoints were collapsed into a single datapoint for visualization in Figure 2.

**eTable 8.** Summary statistics for change from baseline\* of tau PET SUVR at Week 25 by composite region

|                                  | <b>Cohort D, Placebo<br/>(N=4)</b> | <b>Cohort C, 60mg every 4<br/>wks (N=3)</b> | <b>Cohort D, 115mg every 12<br/>wks (N=6)</b> |
|----------------------------------|------------------------------------|---------------------------------------------|-----------------------------------------------|
| <b>Frontal Composite</b>         |                                    |                                             |                                               |
| Mean (SD)                        | 0.096 (0.0340)                     | -0.029 (0.1556)                             | 0.042 (0.0888)                                |
| Median                           | 0.106                              | -0.011                                      | 0.052                                         |
| Q1, Q3                           | 0.073, 0.119                       | -0.193, 0.116                               | -0.032, 0.129                                 |
| Min, Max                         | 0.05, 0.12                         | -0.19, 0.12                                 | -0.08, 0.13                                   |
| <b>Cingulate Composite</b>       |                                    |                                             |                                               |
| Mean (SD)                        | 0.081 (0.0603)                     | -0.090 (0.1003)                             | 0.035 (0.0679)                                |
| Median                           | 0.093                              | -0.044                                      | 0.015                                         |
| Q1, Q3                           | 0.038, 0.124                       | -0.205, -0.021                              | -0.014, 0.088                                 |
| Min, Max                         | 0.00, 0.14                         | -0.21, -0.02                                | -0.03, 0.14                                   |
| <b>Medial Temporal Composite</b> |                                    |                                             |                                               |
| Mean (SD)                        | -0.015 (0.1091)                    | -0.122 (0.2634)                             | -0.038 (0.2137)                               |
| Median                           | -0.021                             | -0.024                                      | -0.028                                        |
| Q1, Q3                           | -0.086, 0.056                      | -0.420, 0.079                               | -0.220, 0.171                                 |
| Min, Max                         | -0.14, 0.12                        | -0.42, 0.08                                 | -0.29, 0.17                                   |
| <b>Temporal Composite</b>        |                                    |                                             |                                               |
| Mean (SD)                        | -0.040 (0.1224)                    | -0.071 (0.1589)                             | 0.018 (0.2263)                                |
| Median                           | -0.056                             | 0.009                                       | 0.028                                         |
| Q1, Q3                           | -0.137, 0.056                      | -0.254, 0.032                               | -0.117, 0.214                                 |
| Min, Max                         | -0.16, 0.11                        | -0.25, 0.03                                 | -0.30, 0.26                                   |
| <b>Parietal Composite</b>        |                                    |                                             |                                               |
| Mean (SD)                        | 0.033 (0.0618)                     | -0.096 (0.0506)                             | 0.039 (0.1718)                                |
| Median                           | 0.050                              | -0.110                                      | 0.069                                         |
| Q1, Q3                           | -0.006, 0.073                      | -0.138, -0.040                              | -0.037, 0.158                                 |
| Min, Max                         | -0.06, 0.09                        | -0.14, -0.04                                | -0.25, 0.22                                   |
| <b>Occipital Composite</b>       |                                    |                                             |                                               |
| Mean (SD)                        | 0.034 (0.1027)                     | -0.080 (0.1295)                             | 0.025 (0.1165)                                |
| Median                           | 0.048                              | -0.060                                      | 0.007                                         |
| Q1, Q3                           | -0.041, 0.109                      | -0.218, 0.038                               | -0.073, 0.098                                 |
| Min, Max                         | -0.10, 0.14                        | -0.22, 0.04                                 | -0.09, 0.21                                   |

\*Baseline was defined as the last non-missing measure prior to the first dose of study drug (BIIB080 or placebo) in the MAD period.

**eTable 9.** Summary statistics for change from baseline\* of tau PET SUVR at Week 100 by composite region

|                                  | <b>Cohort D (Placebo → 115mg every 12 wks) (N=2)</b> | <b>Cohort C (60mg every 4 wks → 60mg every 12 wks) (N=2)</b> | <b>Cohort D (115mg every 12 wks → 115mg every 12 wks) (N=8)</b> |
|----------------------------------|------------------------------------------------------|--------------------------------------------------------------|-----------------------------------------------------------------|
| <b>Frontal Composite</b>         |                                                      |                                                              |                                                                 |
| Mean (SD)                        | -0.244 (0.0526)                                      | -0.342 (0.2239)                                              | -0.102 (0.2757)                                                 |
| Median                           | -0.244                                               | -0.342                                                       | -0.053                                                          |
| Q1, Q3                           | -0.281, -0.207                                       | -0.500, -0.183                                               | -0.205, 0.022                                                   |
| Min, Max                         | -0.28, -0.21                                         | -0.50, -0.18                                                 | -0.64, 0.29                                                     |
| <b>Cingulate Composite</b>       |                                                      |                                                              |                                                                 |
| Mean (SD)                        | -0.396 (0.1541)                                      | -0.447 (0.1336)                                              | -0.196 (0.2517)                                                 |
| Median                           | -0.396                                               | -0.447                                                       | -0.107                                                          |
| Q1, Q3                           | -0.505, -0.287                                       | -0.541, -0.352                                               | -0.339, -0.080                                                  |
| Min, Max                         | -0.51, -0.29                                         | -0.54, -0.35                                                 | -0.66, 0.14                                                     |
| <b>Medial Temporal Composite</b> |                                                      |                                                              |                                                                 |
| Mean (SD)                        | -0.660 (0.0548)                                      | -0.566 (0.0318)                                              | -0.647 (0.4444)                                                 |
| Median                           | -0.660                                               | -0.566                                                       | -0.579                                                          |
| Q1, Q3                           | -0.699, -0.621                                       | -0.589, -0.544                                               | -0.960, -0.416                                                  |
| Min, Max                         | -0.70, -0.62                                         | -0.59, -0.54                                                 | -1.35, 0.09                                                     |
| <b>Temporal Composite</b>        |                                                      |                                                              |                                                                 |
| Mean (SD)                        | -0.704 (0.1987)                                      | -0.446 (0.3380)                                              | -0.573 (0.5463)                                                 |
| Median                           | -0.704                                               | -0.446                                                       | -0.469                                                          |
| Q1, Q3                           | -0.844, -0.563                                       | -0.685, -0.207                                               | -1.026, -0.319                                                  |
| Min, Max                         | -0.84, -0.56                                         | -0.69, -0.21                                                 | -1.34, 0.38                                                     |
| <b>Parietal Composite</b>        |                                                      |                                                              |                                                                 |
| Mean (SD)                        | -0.456 (0.2204)                                      | -0.404 (0.5763)                                              | -0.385 (0.7506)                                                 |
| Median                           | -0.456                                               | -0.404                                                       | -0.158                                                          |
| Q1, Q3                           | -0.612, -0.300                                       | -0.812, 0.003                                                | -0.724, 0.118                                                   |
| Min, Max                         | -0.61, -0.30                                         | -0.81, 0.00                                                  | -1.95, 0.41                                                     |
| <b>Occipital Composite</b>       |                                                      |                                                              |                                                                 |
| Mean (SD)                        | -0.440 (0.5563)                                      | -0.171 (0.3453)                                              | -0.381 (0.6844)                                                 |
| Median                           | -0.440                                               | -0.171                                                       | -0.070                                                          |
| Q1, Q3                           | -0.833, -0.047                                       | -0.415, 0.073                                                | -0.820, 0.114                                                   |
| Min, Max                         | -0.83, -0.05                                         | -0.42, 0.07                                                  | -1.71, 0.22                                                     |

\*Baseline was defined as the last non-missing measure prior to the first dose of study drug (BIIB080 or placebo) in the MAD period.

**eTable 10.** Summary statistics for change from baseline\* of partial volume-corrected tau PET SUVR at Week 25 by composite region

|                                  | <b>Cohort D, Placebo<br/>(N=4)</b> | <b>Cohort C, 60mg every 4<br/>wks (N=3)</b> | <b>Cohort D, 115mg every 12<br/>wks (N=6)</b> |
|----------------------------------|------------------------------------|---------------------------------------------|-----------------------------------------------|
| <b>Frontal Composite</b>         |                                    |                                             |                                               |
| Mean (SD)                        | 0.217 (0.0897)                     | -0.016 (0.1517)                             | 0.057 (0.1702)                                |
| Median                           | 0.205                              | 0.000                                       | 0.097                                         |
| Q1, Q3                           | 0.147, 0.287                       | -0.175, 0.127                               | -0.008, 0.200                                 |
| Min, Max                         | 0.13, 0.33                         | -0.18, 0.13                                 | -0.25, 0.20                                   |
| <b>Cingulate Composite</b>       |                                    |                                             |                                               |
| Mean (SD)                        | 0.187 (0.1426)                     | 0.148 (0.2300)                              | 0.098 (0.1395)                                |
| Median                           | 0.207                              | 0.097                                       | 0.096                                         |
| Q1, Q3                           | 0.088, 0.285                       | -0.052, 0.399                               | 0.045, 0.138                                  |
| Min, Max                         | 0.00, 0.34                         | -0.05, 0.40                                 | -0.11, 0.32                                   |
| <b>Medial Temporal Composite</b> |                                    |                                             |                                               |
| Mean (SD)                        | 0.044 (0.0758)                     | -0.277 (0.5028)                             | -0.103 (0.3812)                               |
| Median                           | 0.013                              | -0.024                                      | -0.041                                        |
| Q1, Q3                           | -0.004, 0.092                      | -0.856, 0.049                               | -0.232, 0.215                                 |
| Min, Max                         | 0.00, 0.16                         | -0.86, 0.05                                 | -0.75, 0.23                                   |
| <b>Temporal Composite</b>        |                                    |                                             |                                               |
| Mean (SD)                        | -0.035 (0.1603)                    | -0.060 (0.0964)                             | 0.040 (0.4791)                                |
| Median                           | 0.022                              | -0.058                                      | 0.117                                         |
| Q1, Q3                           | -0.148, 0.078                      | -0.157, 0.035                               | -0.157, 0.455                                 |
| Min, Max                         | -0.26, 0.08                        | -0.16, 0.04                                 | -0.76, 0.47                                   |
| <b>Parietal Composite</b>        |                                    |                                             |                                               |
| Mean (SD)                        | 0.074 (0.1017)                     | -0.225 (0.2832)                             | 0.039 (0.3545)                                |
| Median                           | 0.063                              | -0.222                                      | 0.106                                         |
| Q1, Q3                           | -0.008, 0.157                      | -0.510, 0.056                               | -0.041, 0.277                                 |
| Min, Max                         | -0.03, 0.20                        | -0.51, 0.06                                 | -0.60, 0.39                                   |
| <b>Occipital Composite</b>       |                                    |                                             |                                               |
| Mean (SD)                        | 0.051 (0.0714)                     | -0.076 (0.1279)                             | 0.041 (0.2290)                                |
| Median                           | 0.067                              | -0.041                                      | -0.015                                        |
| Q1, Q3                           | -0.002, 0.104                      | -0.218, 0.030                               | -0.098, 0.287                                 |
| Min, Max                         | -0.05, 0.11                        | -0.22, 0.03                                 | -0.24, 0.33                                   |

\*Baseline was defined as the last non-missing measure prior to the first dose of study drug (BIIB080 or placebo) in the MAD period.

**eTable 11.** Summary statistics for change from baseline\* of partial volume-corrected tau PET SUVR at Week 100 by composite region

|                                  | <b>Cohort D (Placebo → 115mg every 12 wks) (N=2)</b> | <b>Cohort C (60mg every 4 wks → 60mg every 12 wks) (N=2)</b> | <b>Cohort D (115mg every 12 wks → 115mg every 12 wks) (N=8)</b> |
|----------------------------------|------------------------------------------------------|--------------------------------------------------------------|-----------------------------------------------------------------|
| <b>Frontal Composite</b>         |                                                      |                                                              |                                                                 |
| Mean (SD)                        | -0.276 (0.1018)                                      | -0.294 (0.3596)                                              | -0.145 (0.4844)                                                 |
| Median                           | -0.276                                               | -0.294                                                       | -0.062                                                          |
| Q1, Q3                           | -0.348, -0.204                                       | -0.54, -0.039                                                | -0.289, 0.088                                                   |
| Min, Max                         | -0.35, -0.20                                         | -0.55, -0.04                                                 | -1.14, 0.51                                                     |
| <b>Cingulate Composite</b>       |                                                      |                                                              |                                                                 |
| Mean (SD)                        | -0.736 (0.4319)                                      | -0.645 (0.7701)                                              | -0.316 (0.4181)                                                 |
| Median                           | -0.736                                               | -0.645                                                       | -0.242                                                          |
| Q1, Q3                           | -1.041, -0.430                                       | -1.190, -0.101                                               | -0.525, -0.055                                                  |
| Min, Max                         | -1.04, -0.43                                         | -1.19, -0.10                                                 | -1.12, 0.23                                                     |
| <b>Medial Temporal Composite</b> |                                                      |                                                              |                                                                 |
| Mean (SD)                        | -0.897 (0.0610)                                      | -0.594 (0.0235)                                              | -0.965 (0.6093)                                                 |
| Median                           | -0.897                                               | -0.594                                                       | -0.974                                                          |
| Q1, Q3                           | -0.941, -0.854                                       | -0.61, -0.577                                                | -1.279, -0.666                                                  |
| Min, Max                         | -0.94, -0.85                                         | -0.61, -0.58                                                 | -1.97, 0.09                                                     |
| <b>Temporal Composite</b>        |                                                      |                                                              |                                                                 |
| Mean (SD)                        | -1.056 (0.2744)                                      | -0.530 (0.8888)                                              | -0.988 (0.9872)                                                 |
| Median                           | -1.056                                               | -0.530                                                       | -0.890                                                          |
| Q1, Q3                           | -1.250, -0.862                                       | -1.159, 0.099                                                | -1.711, -0.550                                                  |
| Min, Max                         | -1.25, -0.86                                         | -1.16, 0.10                                                  | -2.41, 0.81                                                     |
| <b>Parietal Composite</b>        |                                                      |                                                              |                                                                 |
| Mean (SD)                        | -0.838 (0.1482)                                      | -0.780 (0.5397)                                              | -0.672 (1.1589)                                                 |
| Median                           | -0.838                                               | -0.780                                                       | -0.398                                                          |
| Q1, Q3                           | -0.943, -0.734                                       | -1.161, -0.398                                               | -0.966, 0.008                                                   |
| Min, Max                         | -0.94, -0.73                                         | -1.16, -0.40                                                 | -3.22, 0.55                                                     |
| <b>Occipital Composite</b>       |                                                      |                                                              |                                                                 |
| Mean (SD)                        | -0.527 (0.7594)                                      | -0.138 (0.4545)                                              | -0.630 (0.9656)                                                 |
| Median                           | -0.527                                               | -0.138                                                       | -0.432                                                          |
| Q1, Q3                           | -1.064, 0.010                                        | -0.459, 0.184                                                | -1.243, 0.153                                                   |
| Min, Max                         | -1.06, 0.01                                          | -0.46, 0.18                                                  | -2.39, 0.39                                                     |

\*Baseline was defined as the last non-missing measure prior to the first dose of study drug (BIIB080 or placebo) in the MAD period.



**eTable 12:** Ventricle, Hippocampus and Whole Brain Volumes. Volume measured in cm<sup>3</sup>. Values are presented as means ± standard deviation. ICV: Intracranial Volume (cm<sup>3</sup>)

| Region                                          | Cohort A+B+C<br>(Placebo →<br>60mg every 12<br>wks) | Cohort D<br>(Placebo →<br>115mg every<br>12 wks) | Cohort A (10mg<br>every 4 wks →<br>60mg every 12<br>wks) | Cohort B (30mg<br>every 4 wks →<br>60mg every 12<br>wks) | Cohort C (60mg<br>every 4 wks → 60mg<br>every 12 wks) | Cohort D 115mg<br>every 12 wks →<br>115 mg every 12<br>wks) |
|-------------------------------------------------|-----------------------------------------------------|--------------------------------------------------|----------------------------------------------------------|----------------------------------------------------------|-------------------------------------------------------|-------------------------------------------------------------|
| <b>Mean Volume at<br/>Baseline (N)</b>          | 7                                                   | 5                                                | 6                                                        | 6                                                        | 9                                                     | 13                                                          |
| Total Ventricle                                 | 48.1±24.2                                           | 47.2±19.2                                        | 51.4±31.7                                                | 43.4±13.8                                                | 31.8±14.6                                             | 41.8±16.9                                                   |
| Total Hippocampus                               | 4.3±0.8                                             | 4.0±0.4                                          | 3.6±0.4                                                  | 4.3±0.4                                                  | 4.0±0.6                                               | 3.7±0.6                                                     |
| Whole Brain                                     | 1117.6±179.0                                        | 1096.7±97.7                                      | 1047.5±121.9                                             | 1085.6±91.3                                              | 1158.7±78.5                                           | 1162.4±113.7                                                |
| Total ICV                                       | 1566.2±193.3                                        | 1514.8±130.8                                     | 1480.7±147.9                                             | 1506.1±131.6                                             | 1557.9±145.8                                          | 1575.8±102.9                                                |
| <b>Change in Volume at<br/>Day 169 (N)</b>      | 7                                                   | 4                                                | 6                                                        | 6                                                        | 8                                                     | 12                                                          |
| Total Ventricle<br>Mean Change from<br>Baseline | 3.1±3.0<br>0.2±0.2                                  | 5.0±6.4<br>0.3±0.5                               | 7.3±4.4<br>0.5±0.3                                       | 10.4±6.6<br>0.7±0.4                                      | 10.9±10.2<br>0.7±0.6                                  | 9.4±7.1<br>0.6±0.5                                          |
| Mean Change from<br>Baseline as % of ICV        |                                                     |                                                  |                                                          |                                                          |                                                       |                                                             |
| Hippocampus<br>Mean Change from<br>Baseline     | 0.01±0.22                                           | 0.07±0.11                                        | -0.03±0.15                                               | 0.12±0.43                                                | -0.19±0.17                                            | -0.21±0.15                                                  |
| Mean Change from<br>Baseline as % of ICV        | 0.00±0.01                                           | 0.00±0.01                                        | -0.00±0.01                                               | 0.01±0.03                                                | -0.01±0.01                                            | -0.01±0.01                                                  |
| Whole Brain<br>Mean Change from<br>Baseline     | -14.3±9.8                                           | 2.7±4.9                                          | -14.2±8.1                                                | -11.4±11.6                                               | 2.9±16.6                                              | -11.8±9.4                                                   |
| Mean Change from<br>Baseline as % of ICV        | -0.9±0.6                                            | 0.2±0.3                                          | -1.0±0.6                                                 | -0.7±0.7                                                 | 0.2±1.1                                               | -0.7±0.6                                                    |
| <b>Change in Volume at<br/>Day 449 (N)</b>      | 2                                                   | 2                                                | 3                                                        | 4                                                        | 7                                                     | 10                                                          |
| Total Ventricle<br>Mean Change from<br>Baseline | 19.9±5.2                                            | 26.6±15.6                                        | 24.7±14.2                                                | 32.7±4.5                                                 | 23.8±27.3                                             | 32.3±19.6                                                   |
| Mean Change from<br>Baseline as % of ICV        | 1.3±0.1                                             | 1.6±0.9                                          | 1.7±1.0                                                  | 2.1±0.3                                                  | 1.5±1.6                                               | 2.1±1.4                                                     |

|                                       |            |            |            |            |            |            |
|---------------------------------------|------------|------------|------------|------------|------------|------------|
| Hippocampus                           |            |            |            |            |            |            |
| Mean Change from Baseline             | -0.49±0.32 | -0.52±0.08 | -0.48±0.25 | -0.70±0.61 | -0.57±0.48 | -0.48±0.19 |
| Mean Change from Baseline as % of ICV | -0.03±0.02 | -0.03±0.01 | -0.03±0.01 | -0.05±0.04 | -0.04±0.03 | -0.03±0.01 |
| Whole Brain                           |            |            |            |            |            |            |
| Mean Change from Baseline             | -56.8±51.8 | -20.3±18.7 | -29.9±17.5 | -47.3±10.7 | -26.2±11.9 | -35.2±15.4 |
| Mean Change from Baseline as % of ICV | -3.5±2.8   | -1.2±1.2   | -2.0±1.0   | -3.0±0.6   | -1.8±1.0   | -2.3±1.0   |

**eFigure 1.** Dosing, CSF sampling, and tau PET scan schedule for the MAD and LTE.

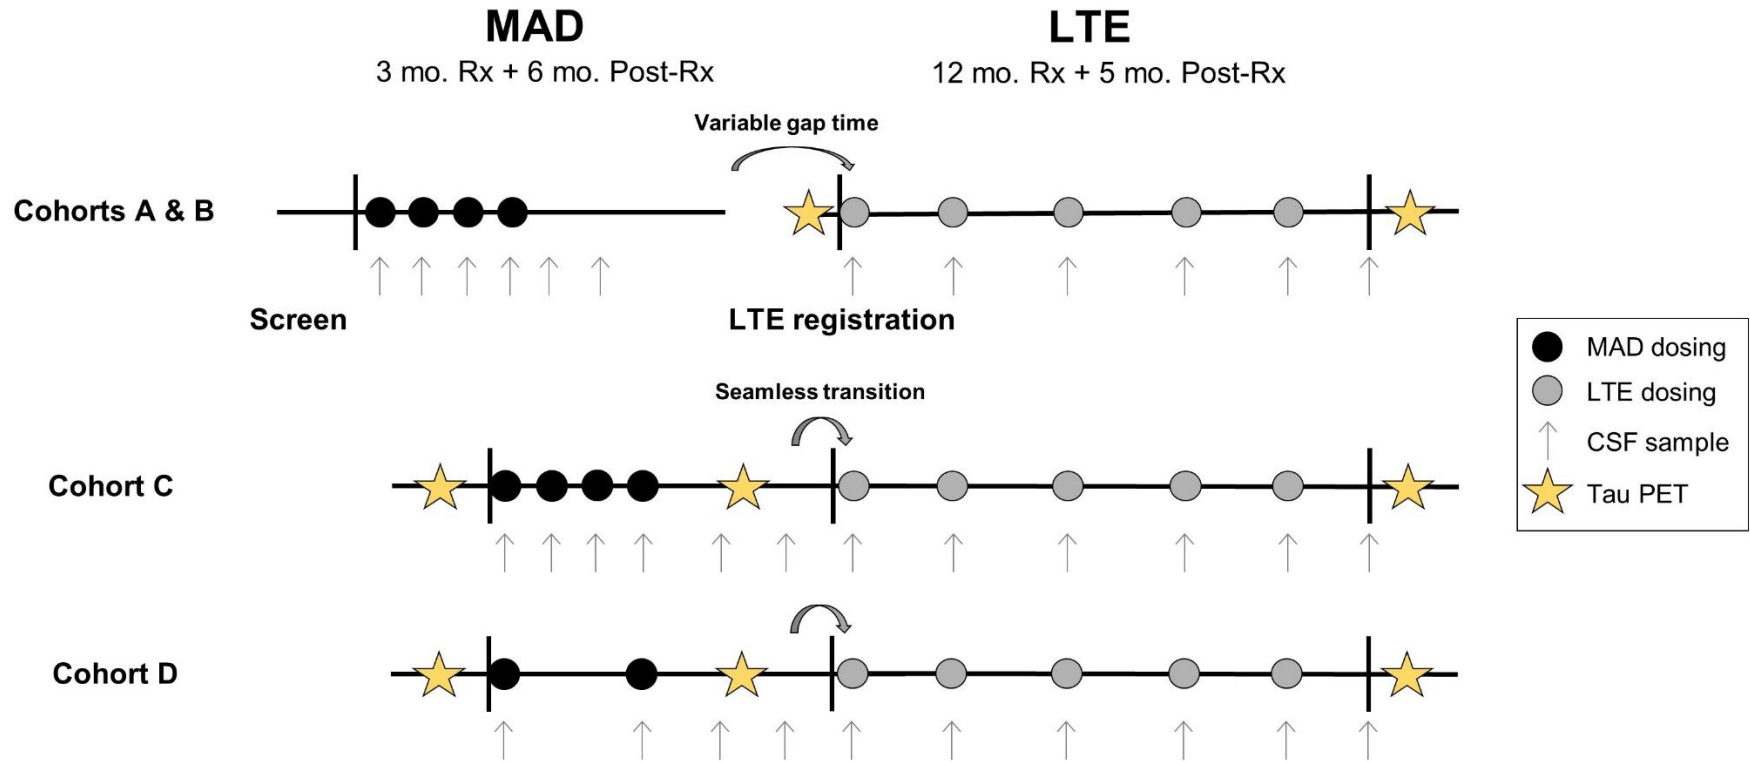

During the MAD, CSF samples were collected prior to study drug administration on Days 1, 29, 57, and 85 in Cohorts A, B, and C, and on Days 1 and 85 in Cohort D. CSF samples were also collected in the post-treatment period of the MAD on Days 113 and 141 in Cohorts A and B, and on Days 141 and 197 in Cohorts C and D. During the LTE, CSF samples were collected prior to study drug administration on LTE Day 1, 85, 169, 253, 337, and 421 and in the post-treatment period on LTE Day 449. Tau PET scans were collected at LTE registration and LTE Day 449 (Week 100) in Cohorts A and B, and at MAD Day 1, MAD Day 169 (Week 25), and LTE Day 449 (Week 100) in Cohorts C and D.

**eFigure 2.** Change from baseline on CSF t-tau and p-tau181 in the MAD and LTE

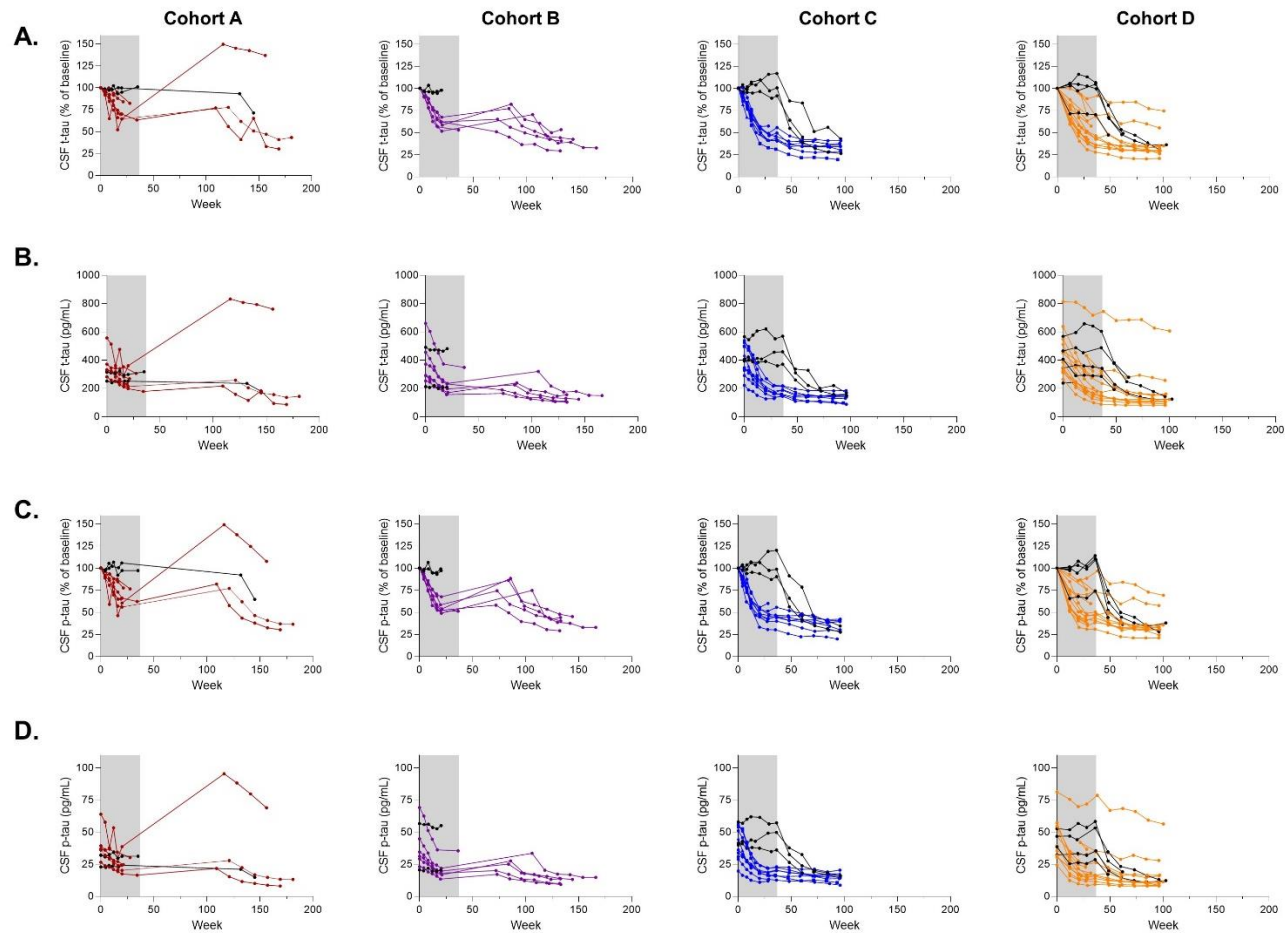

Change from baseline on levels of t-tau (A and B) and p-tau181 (C and D) in the CSF are plotted both as a percent of baseline values and as raw concentration values. The period corresponding to the MAD study is shaded in grey. Data are presented based on actual collection dates to clearly demonstrate the gap period between the end of the MAD and beginning of the LTE for Cohorts A & B. Participants treated with placebo during the MAD are shown in black, while participants treated with BIIB080 during the MAD are shown in color.

**eFigure 3.** Longitudinal tau PET for individual participants

**A. Tau PET SUVR Change from Baseline**

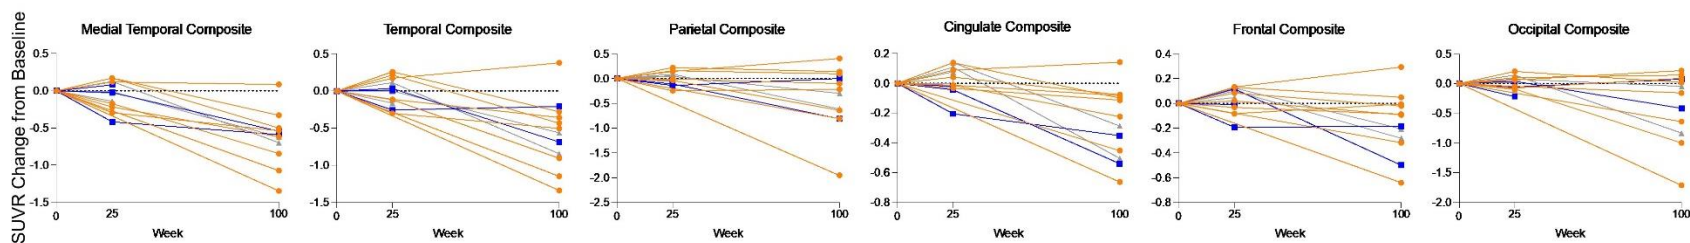

**B. Tau PET SUVR**

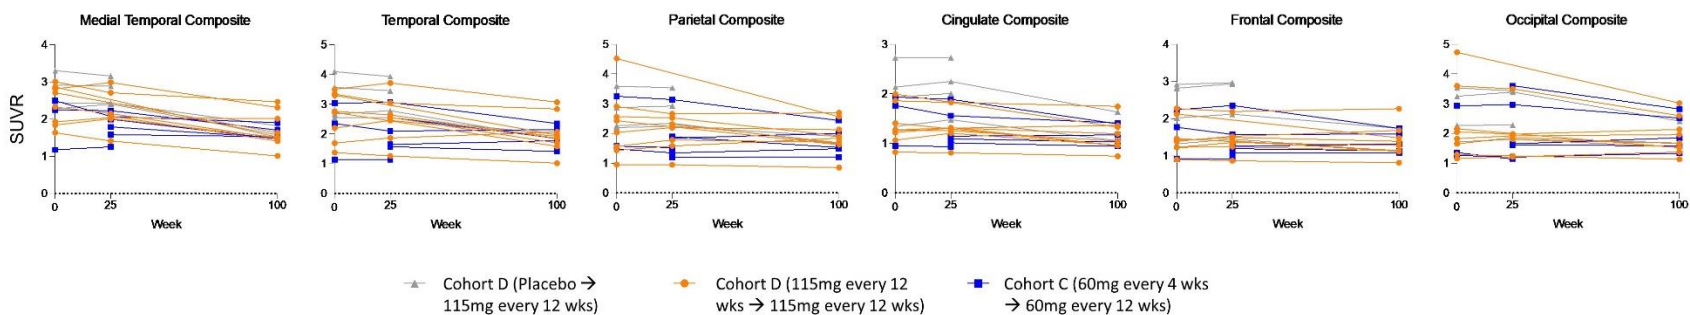

Change from baseline in tau PET SUVR is shown for each participant with available longitudinal tau PET data at weeks 25 and 100 in the top graphs (A). Tau PET SUVR is shown for each participant with available longitudinal tau PET data at screening (week 0), weeks 25, and week 100 in the bottom graphs (B).

**eFigure 4.** Change from baseline on partial volume corrected tau PET in the MAD and LTE

**A. MAD Partial Volume Corrected Tau PET**

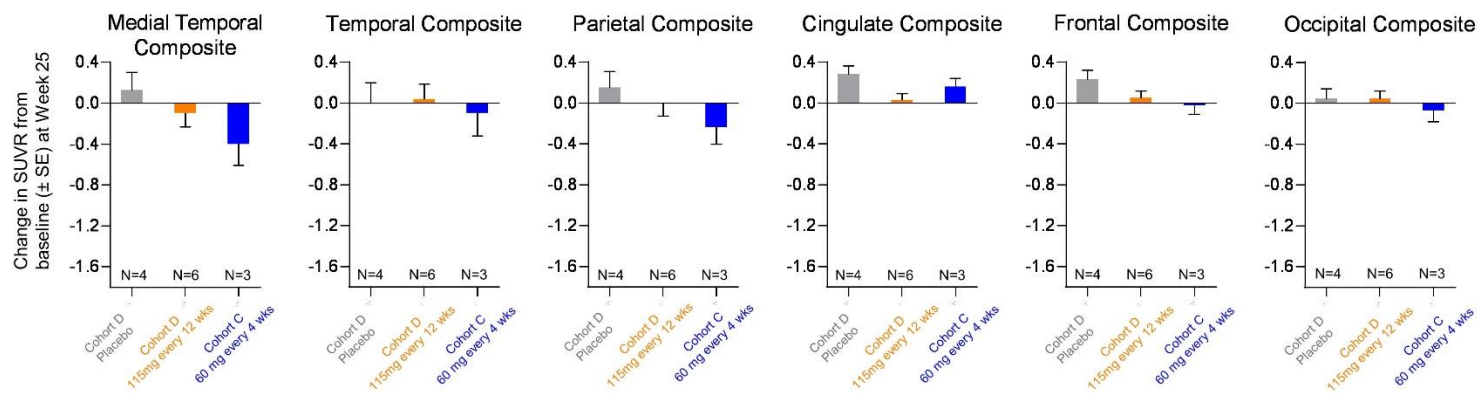

**B. MAD+LTE Partial Volume Corrected Tau PET**

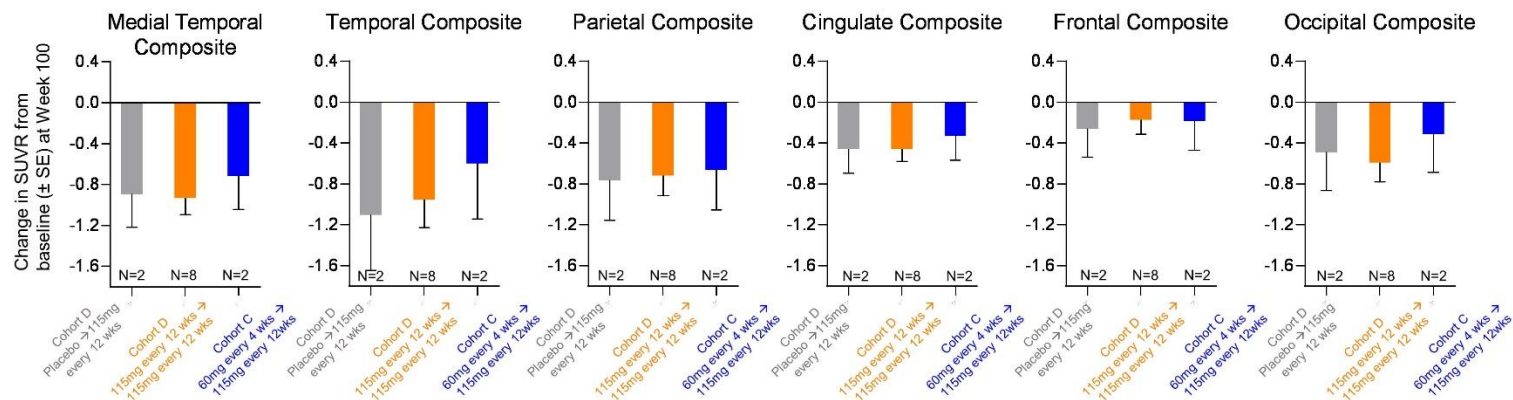

Adjusted mean change from baseline on partial volume corrected tau PET SUVR at Week 25 in the MAD (A) and Week 100 in the LTE (B). The adjusted mean SUVR change was estimated using an ANCOVA model with fixed effects of treatment group and baseline SUVR value. Error bars represent standard error.

**eFigure 5.** Baseline tau PET vs change from baseline tau PET

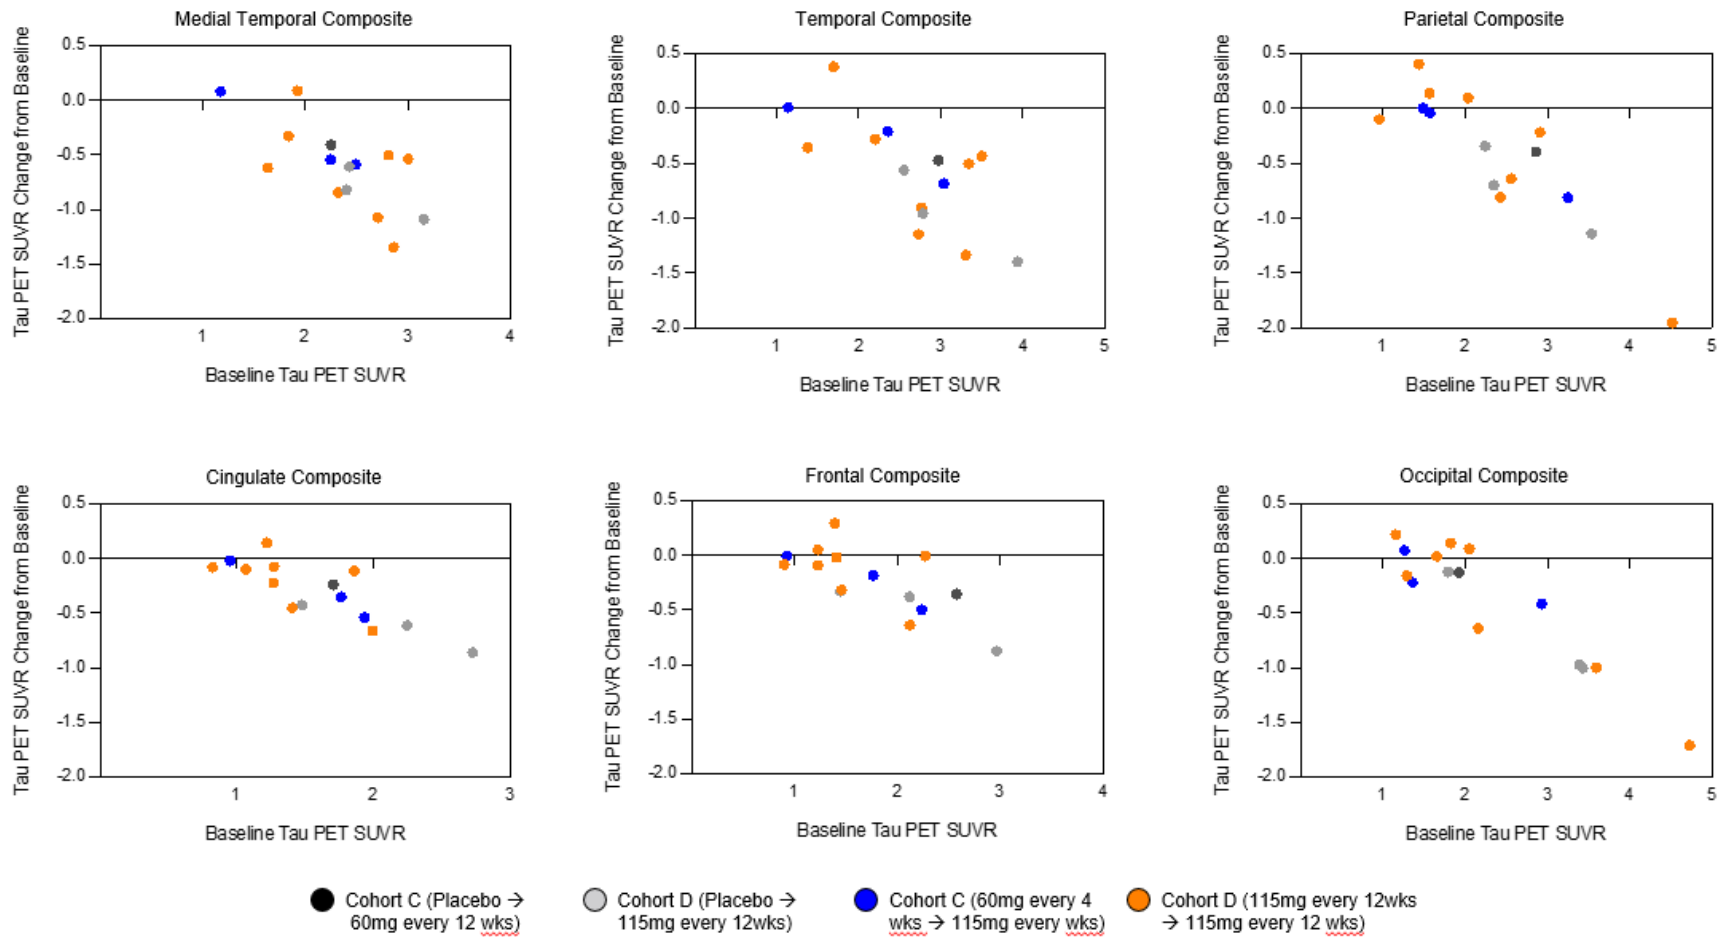

Scatterplots show baseline tau PET SUVR (x-axis) and tau PET SUVR change from baseline across the six ROIs.

**eFigure 6.** Relationship between model-predicted CSF PK and tau PET change from baseline

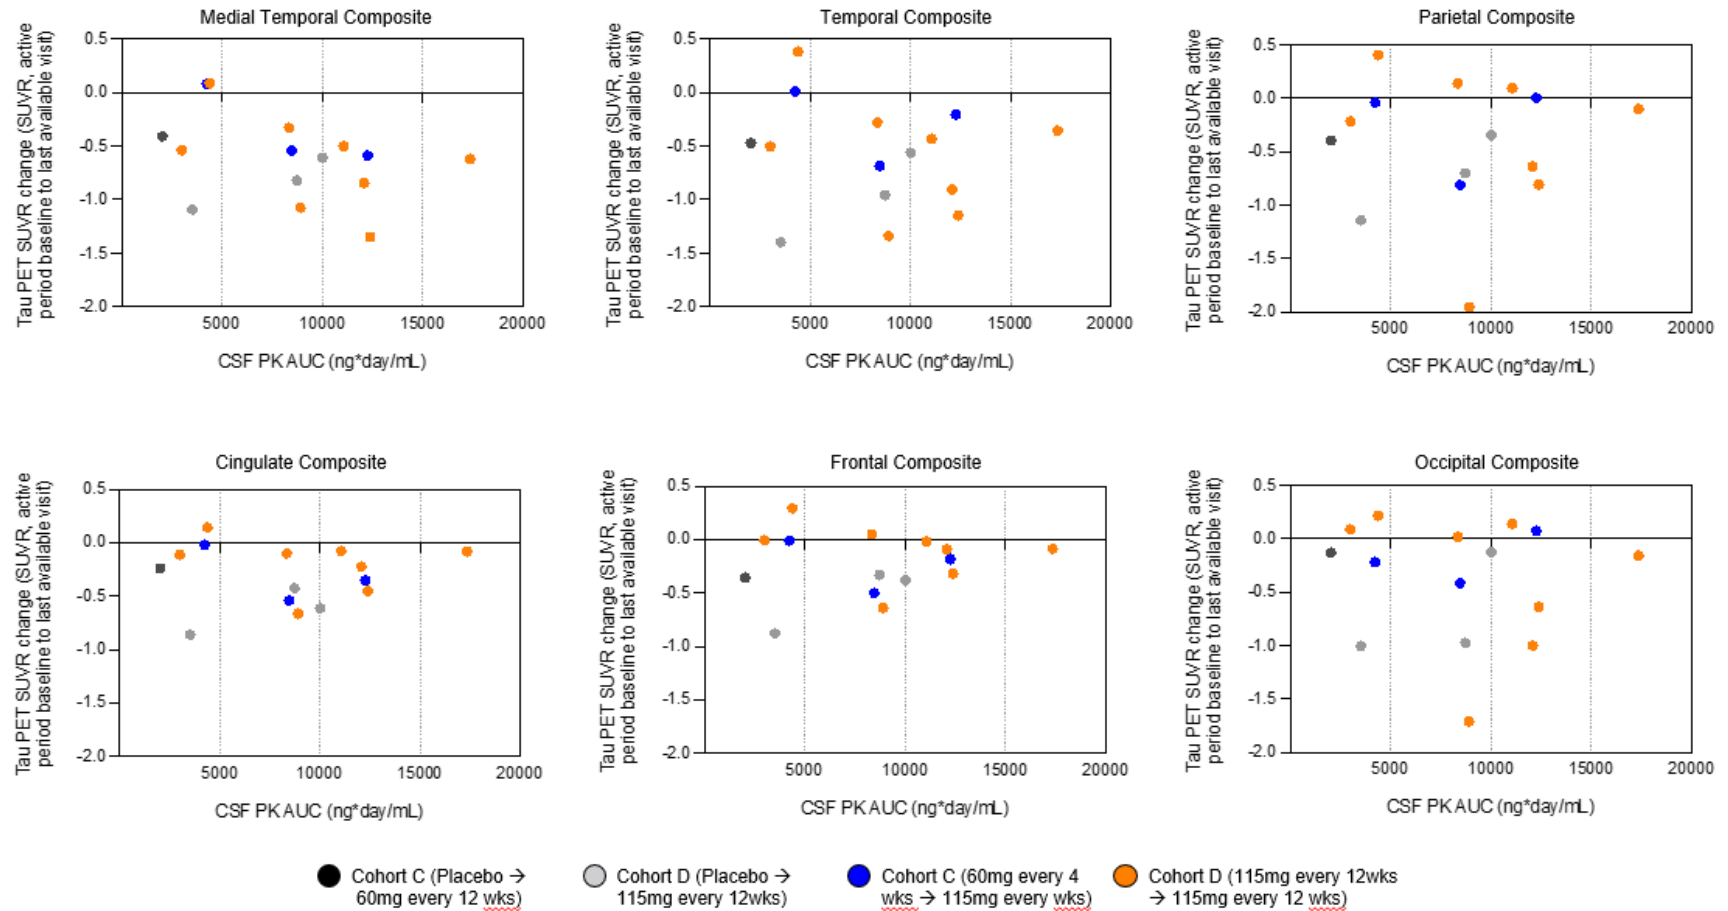

Scatterplots show the model-predicted CSF PK and tau PET SUVR change from baseline, unadjusted for baseline SUVR, across the six ROIs.



## eReferences

<sup>1</sup>Greve, DN, Svarer, C, Fisher, PM, et al. Cortical surface-based analysis reduces bias and variance in kinetic modeling of brain PET data. *Neuroimage*. 2014; 92: 225-236. doi:

10.1016/j.neuroimage.2013.12.021.

<sup>2</sup>Thomas, BA, Erlandsson, K, Modat, M, et al. The importance of appropriate partial volume correction for PET quantification in Alzheimer's disease. *Eur J Nucl Med Mol Imaging*. 2011; 38(6), 1104–1119.

doi: 10.1007/s00259-011-1745-9.

<sup>3</sup>Dadar, M, Camicioli, R, Duchesne, S. Multi sequence average templates for aging and neurodegenerative disease populations. *Sci Data*. 2022; 9(1), 238. doi: 10.1038/s41597-022-01341-2.

<sup>4</sup>Hammers A, Allom R, Koepp MJ, et al. Three-dimensional maximum probability atlas of the human brain, with particular reference to the temporal lobe. *Hum Brain Mapp*. 2003;19(4):224-47. Doi:

10.1002/hbm.10123.

<sup>5</sup>Budd Haeberlein S, Aisen PS, Barkhof F, et al. Two Randomized Phase 3 Studies of Aducanumab in Early Alzheimer's Disease. *JPAD*. 2022; 9(2): 197-210. doi:10.14283/jpad.2022.30.
