# Supplementary material
Source: PubMed Central journal article supplement (PMC10616768)
Supplement: jamaneurol-e233861-s004.pdf [file jamaneurol-e233861-s004.pdf]

## Data Sharing Statement

Edwards. Exploratory Tau Biomarker Results From a Multiple Ascending-Dose Study of BIIB080 in Alzheimer Disease. *JAMA Neurol.* Published October 30, 2023.  
doi:10.1001/jamaneurol.2023.3861

### Data

**Data available:** No

### Additional Information

**Explanation for why data not available:** Individual participant data collected during the trial may be shared after anonymization and on approval of the research proposal in accordance with internal policies and procedures. Biogen commits to sharing patient-level data, study-level data, CSRs, and protocols with qualified scientific researchers who provide a methodologically sound proposal. Biogen reviews all data requests internally based on the review criteria and in accordance with our Clinical Trial Transparency and Data Sharing Policy, which is available at <https://www.biogenclinicaltransparency.com>. Deidentified data and documents will be shared under agreements that further protect against participant reidentification. To request access to data, please visit <https://vivli.org/>.
